# Supplementary material
Source: Research Square preprint supplement (doi:10.21203/rs.3.rs-8917150/v1)
Supplement: Supplementary file 1 [file c11ddc6c5872142c518b66e0.docx]

**Supplement Table S1: Key Hyperparameters and Input Imaging Features of Machine Learning Models**

| **Model** | **Model Types** | **Core Hyperparameter Configuration** | **Input Imaging Feature Sources** |
| --- | --- | --- | --- |
| SVM | L-SVM | Kernel: linear; Cost parameter (C) = 0.5; Kernel coefficient (gamma) = 'scale'; Probability estimation = True; Shrinking = True; Tolerance (tol) = 0.1 | Echocardiography (LV septal thickness, LVEDD, LVEF, etc.), CT (pericardial calcification/thickness), CMR (Myo Mass, strain parameters, etc.) |
|  | Q-SVM | Kernel: poly; Polynomial degree = 2; C = 0.5; gamma = 'scale'; Coefficient 0 (coef0) = 0.01; Probability estimation = True; Shrinking = True; tol = 0.1 | Same as above |
|  | C-SVM | Kernel: poly; Polynomial degree = 3; C = 0.5; gamma = 'scale'; coef0 = 0.01; Probability estimation = True; Shrinking = True; tol = 0.1 | Same as above |
|  | G-SVM | Kernel: rbf (radial basis function); C = 1.0; gamma = 'scale'; Probability estimation = True; Shrinking = True; tol = 0.1 | Same as above |
| Decision Tree | Classification Tree | Maximum depth (max_depth) = 3; Minimum samples split (min_samples_split) = 5; Minimum samples per leaf (min_samples_leaf) = 5; Maximum features (max_features) = None; Class weight = 'balanced'; Random state = 42 | Same as above |
| Logistic Regression | L2-Regularized Logistic Regression | Regularization strength (C) = 0.5; Penalty = 'l2'; Solver = 'lbfgs'; Maximum iterations (max_iter) = 10; Class weight = 'balanced'; Random state = 42 | Same as above |
| k-Nearest Neighbor (k-NN) | k-NN Classifier | Number of neighbors (n_neighbors) = 5; Weighting method (weights) = 'uniform'; Search algorithm (algorithm) = 'auto'; Leaf size = 10 | Same as above |

*All machine learning models in this study used structured imaging features as inputs. Feature preprocessing included three steps: 1) Missing value imputation (features with <20% missingness were imputed using the k-NN algorithm); 2) Standardization (features were scaled to a mean of 0 and standard deviation of 1 using StandardScaler); 3) Multimodal feature fusion (standardized feature matrices of the three modalities were directly concatenated, with no additional fusion algorithms).*

*CMR, cardiac magnetic resonance;; C-SVM, cubic SVM; G-SVM, Gaussian-SVM; KNN, k-nearest neighbor ; L-SVM, linear SVM; LV, left ventricle; LVEDD, left ventricular end-diastolic diameter; LVEF, left ventricular ejection fraction; LVESD, left ventricular end-systolic diameter; LVESV, left ventricular end-systolic volume; Myo Mass, myocardial mass (diastolic); SVM: support vector machine; Q-SVM: quadratic SVM.*
